# Supplementary material
Source: ML conference proceedings conference paper supplement (https://openreview.net/forum?id=2-CflpDkezH)
Supplement: supplementary_material [file attachment]

# Appendix

## Table of Contents

|                                                             |           |
|-------------------------------------------------------------|-----------|
| <b>A Policy-Induced Joint Measure</b>                       | <b>14</b> |
| <b>B Properties of Modification</b>                         | <b>15</b> |
| <b>C Proof of Theorem 1</b>                                 | <b>17</b> |
| C.1 Proof of item 1 for unconstrained Markov game . . . . . | 17        |
| C.2 Proof of item 2 for constrained Markov game . . . . .   | 18        |
| <b>D Proof of Theorem 2</b>                                 | <b>19</b> |
| <b>E The Range of the Optimal Dual Variable</b>             | <b>20</b> |
| <b>F Proof of Theorem 3</b>                                 | <b>20</b> |
| <b>G Proof of Corollary 5.1</b>                             | <b>23</b> |

## A Policy-Induced Joint Measure

We introduce policy-induced joint measure as a useful tool to help prove Theorems 1 and 2. Specifically, for any  $h, h'$ , we define  $p_\pi(s_{1:h}, a_{1:h'})$  as the joint distribution of  $(s_{1:h}, a_{1:h'})$  induced by policy  $\pi$ . Based on the underlying Markov decision process, it can be easily verified that  $p_\pi$  takes the following forms.

$$p_\pi(s_1) = \rho(s_1), \quad (16)$$

$$p_\pi(s_{1:h}, a_{1:h-1}) = p_\pi(s_{1:h-1}, a_{1:h-1})\mathcal{P}(s_h|s_{h-1}, a_{h-1}), \quad (17)$$

$$p_\pi(s_{1:h}, a_{1:h}) = \rho(s_1)\pi_1(a_1|s_1) \prod_{h'=2}^h \mathcal{P}(s_{h'}|s_{h'-1}, a_{h'-1})\pi_{h'}(a_{h'}|s_{1:h'}, a_{1:h'-1}). \quad (18)$$

Eqs. (17) and (18) further imply that

$$p_\pi(s_{1:h}, a_{1:h}) = p_\pi(s_{1:h}, a_{1:h-1})\pi(a_h|s_{1:h}, a_{1:h-1}). \quad (19)$$

Conversely, given a proper joint probability measure  $p$ , we can infer its corresponding inducing policy  $\pi$  as follows.

**Lemma A.1.** *Consider any joint probability measure  $p$  that satisfies eqs. (16) and (17) (replace all  $p_\pi$  with  $p$ ). Then, the following policy  $\pi$  induces  $p$ .*

$$\pi_h(a_h|s_{1:h}, a_{1:h-1}) = \begin{cases} \frac{p(s_{1:h}, a_{1:h})}{p(s_{1:h}, a_{1:h-1})}, & \text{if } p(s_{1:h}, a_{1:h-1}) > 0 \\ \text{arbitrary distribution,} & \text{if } p(s_{1:h}, a_{1:h-1}) = 0 \end{cases}. \quad (20)$$

*Proof.* It suffices to prove that  $p_\pi(s_{1:h}, a_{1:h}) = p(s_{1:h}, a_{1:h})$  for any  $s_{1:h}, a_{1:h}$ , i.e.,  $p$  is exactly the joint measure  $p_\pi$  induced by  $\pi$ . We consider the following two cases.

**Case 1:**  $p(s_{1:h}, a_{1:h-1}) > 0$ . In this case, we must have that  $p(s_{1:h'}, a_{1:h'-1}) > 0$  for any  $1 \leq h' \leq h$ . Therefore, by eq. (20) we have  $\pi_{h'}(a_{h'}|s_{1:h'}, a_{1:h'-1}) = \frac{p(s_{1:h'}, a_{1:h'})}{p(s_{1:h'}, a_{1:h'-1})}$  for any  $1 \leq h' \leq h$ . Substitute this policy  $\pi$  into eq. (18) and note that  $\rho(s_1) = p(s_1)$ , we obtain that

$$p_\pi(s_{1:h}, a_{1:h}) = p(s_1) \frac{p(s_1, a_1)}{p(s_1)} \prod_{h'=2}^h \mathcal{P}(s_{h'}|s_{h'-1}, a_{h'-1}) \frac{p(s_{1:h'}, a_{1:h'})}{p(s_{1:h'}, a_{1:h'-1})}$$

$$\stackrel{(i)}{=} p(s_1, a_1) \prod_{h'=2}^h \frac{p(s_{1:h'}, a_{1:h'})}{p(s_{1:h'-1}, a_{1:h'-1})} = p(s_{1:h}, a_{1:h}),$$

where (i) follows from eq. (17) (replace all  $p_\pi$  with  $p$ ).

**Case 2:**  $p(s_{1:h}, a_{1:h-1}) = 0$ . In this case, we have that  $p(s_{1:h}, a_{1:h}) = 0$ . Hence, it suffices to prove that  $p_\pi(s_{1:h}, a_{1:h}) = 0$  as well. We further consider the following two subcases.

(Case 2.1) If  $p(s_1) = \rho(s_1) = 0$ , then  $p_\pi(s_{1:h}, a_{1:h}) = 0$  by substituting  $\rho(s_1) = 0$  into eq. (18).

(Case 2.2) If  $p(s_1) = \rho(s_1) > 0$  and because Case 2 assumes that  $p(s_{1:h}, a_{1:h-1}) = 0$ , then there must exist  $1 \leq h' \leq h-1$  such that  $p(s_{1:h'}, a_{1:h'-1}) > 0$  and  $p(s_{1:h'+1}, a_{1:h'}) = 0$ . On the other hand, note that eq. (18) implies that  $p_\pi(s_{1:h}, a_{1:h})$  contains the following multiplicative factor

$$\begin{aligned} & \pi_{h'}(a_{h'} | s_{1:h'}, a_{1:h'-1}) \mathcal{P}(s_{h'+1} | s_{h'}, a_{h'}) \\ &= \mathcal{P}(s_{h'+1} | s_{h'}, a_{h'}) \frac{p(s_{1:h'}, a_{1:h'})}{p(s_{1:h'-1}, a_{1:h'-1})} \stackrel{(i)}{=} \frac{p(s_{1:h'+1}, a_{1:h'})}{p(s_{1:h'}, a_{1:h'-1})} = 0 \end{aligned} \quad (21)$$

where (i) uses eq. (17). Thus we conclude that  $p_\pi(s_{1:h}, a_{1:h}) = 0$ .  $\square$

With the policy-induced joint measure  $p_\pi$ , we can rewrite the value function  $V_j^{(m)}(\pi) := \mathbb{E}_\pi[\sum_{h=1}^H r_{j,h}^{(m)} | s_1 \sim \rho]$  and the Lagrangian function eq. (6) as follows.

$$V_j^{(m)}(\pi) = \tilde{V}_j^{(m)}(p_\pi) := \sum_{s_{1:H}, a_{1:H}} p_\pi(s_{1:H}, a_{1:H}) \sum_{h=1}^H r_{j,h}^{(m)}(s_h, a_h), \quad (22)$$

$$L^{(m)}(\pi, \lambda^{(m)}) = \tilde{L}^{(m)}(p_\pi, \lambda^{(m)}) := \tilde{V}_0^{(m)}(p_\pi) + \sum_{j=1}^{d_m} \lambda_j (\tilde{V}_j^{(m)}(p_\pi) - c_j^{(m)}). \quad (23)$$

Thus, both the value function  $V_j^{(m)}(\pi)$  and the Lagrangian function  $L^{(m)}(\pi, \lambda^{(m)})$  can be rewritten as linear functions of  $p_\pi$ . Such a linear form helps simplify the problem and prove the key Theorems 1 and 2.

## B Properties of Modification

In this section, we present some useful properties of the modification operator. Recall that for any policy  $\pi$  and any modification operator  $\phi^{(m)}$ , the modified policy  $\phi_h^{(m)} \circ \pi_h$  at time step  $h$  is defined as follows: we first generate joint action  $a_h = [a_h^{(m)}, a_h^{(\setminus m)}] \sim \pi_h(\cdot | s_{1:h}, a_{1:h-1})$ . Then,  $\phi_h^{(m)}$  randomly modifies  $a_h^{(m)}$  to  $\tilde{a}_h^{(m)} \sim \phi_h^{(m)}(\cdot | s_{1:h}, a_{1:h-1}, a_h^{(m)})$ . To summarize, the modified policy  $\phi_h^{(m)} \circ \pi_h$  takes the following form.

$$\begin{aligned} & (\phi_h^{(m)} \circ \pi_h)([\tilde{a}_h^{(m)}, a_h^{(\setminus m)}] | s_{1:h}, a_{1:h-1}) \\ &= \sum_{a_h^{(m)}} \phi_h^{(m)}(\tilde{a}_h^{(m)} | s_{1:h}, a_{1:h-1}, a_h^{(m)}) \pi_h(a_h | s_{1:h}, a_{1:h-1}). \end{aligned} \quad (24)$$

Next, let  $p_{\phi^{(m)} \circ \pi}$  and  $p_{\tilde{\phi}^{(m)} \circ \pi}$  be the joint measures induced by the modified policies  $\phi^{(m)} \circ \pi$  and  $\tilde{\phi}^{(m)} \circ \pi$ , respectively, for any  $\phi^{(m)}, \tilde{\phi}^{(m)}$ . In the proof of Theorems 1 and 2, we introduce the following linear combination of these two joint measures.

$$p_\lambda := \lambda p_{\phi^{(m)} \circ \pi} + (1 - \lambda) p_{\tilde{\phi}^{(m)} \circ \pi}, \lambda \in \mathbb{R}. \quad (25)$$

We note that  $\sum_{s_{1:h}, a_{1:h}} p_\lambda(s_{1:h}, a_{1:h}) = 1$  for any  $\lambda \in \mathbb{R}$ , so  $p_\lambda$  is also a proper probability measure if  $\lambda$  is selected such that  $p_\lambda(s_{1:h}, a_{1:h}) \geq 0$  for any  $s_{1:h}, a_{1:h}$ . In this case, since the joint measures  $p_{\phi^{(m)} \circ \pi}$  and  $p_{\tilde{\phi}^{(m)} \circ \pi}$  satisfy eqs. (16) and (17) by definition, it is easy to verify that  $p_\lambda$  also satisfies eqs. (16) and (17) and hence is a proper joint measure. Therefore, by Lemma A.1 we can find its inducing policy  $\pi_\lambda$  using eq. (20). Next, we show that such an inducing policy  $\pi_\lambda$  can actually be viewed as the policy  $\pi$  modified by a certain stochastic modification.

**Lemma B.1.** Regarding the  $p_\lambda$  defined in eq. (25), if  $\lambda \in \mathbb{R}$  is selected such that the following two conditions hold for any  $s_{1:h}, a_{1:h-1}, a_h^{(m)}, \tilde{a}_h^{(m)}$ :

$$p_\lambda(s_{1:h}, a_{1:h-1}) \geq 0 \quad (26)$$

$$\begin{aligned} & \lambda p_{\phi^{(m)} \circ \pi}(s_{1:h}, a_{1:h-1}) \phi_h^{(m)}(\tilde{a}_h^{(m)} | s_{1:h}, a_{1:h-1}, a_h^{(m)}) \\ & + (1 - \lambda) p_{\tilde{\phi}^{(m)} \circ \pi}(s_{1:h}, a_{1:h-1}) \tilde{\phi}_h^{(m)}(\tilde{a}_h^{(m)} | s_{1:h}, a_{1:h-1}, a_h^{(m)}) \geq 0, \end{aligned} \quad (27)$$

then its inducing policy (defined by eq. (20)) can be written as  $\pi_\lambda = \phi_\lambda^{(m)} \circ \pi$ , where the stochastic modification  $\phi_\lambda^{(m)}$  takes the following form.

$$\begin{aligned} & \phi_{\lambda,h}^{(m)}(\tilde{a}_h^{(m)} | s_{1:h}, a_{1:h-1}, a_h^{(m)}) = \\ & \begin{cases} \frac{1}{p_\lambda(s_{1:h}, a_{1:h-1})} \left[ \lambda p_{\phi^{(m)} \circ \pi}(s_{1:h}, a_{1:h-1}) \phi_h^{(m)}(\tilde{a}_h^{(m)} | s_{1:h}, a_{1:h-1}, a_h^{(m)}) \right. \\ \quad \left. + (1 - \lambda) p_{\tilde{\phi}^{(m)} \circ \pi}(s_{1:h}, a_{1:h-1}) \tilde{\phi}_h^{(m)}(\tilde{a}_h^{(m)} | s_{1:h}, a_{1:h-1}, a_h^{(m)}) \right], & \text{if } p_\lambda(s_{1:h}, a_{1:h-1}) > 0 \\ \text{Arbitrary distribution,} & \text{if } p_\lambda(s_{1:h}, a_{1:h-1}) = 0 \end{cases} \end{aligned} \quad (28)$$

*Proof.* We first show that  $\phi_{\lambda,h}^{(m)}(\cdot | s_{1:h}, a_{1:h-1}, a_h^{(m)})$  is a proper stochastic modification. By eq. (28), we only need to consider the case  $p_\lambda(s_{1:h}, a_{1:h-1}) > 0$ . In this case, based on the condition in eq. (27), we conclude that  $\phi_{\lambda,h}^{(m)}(\tilde{a}_h^{(m)} | s_{1:h}, a_{1:h-1}, a_h^{(m)}) \geq 0$ . In addition,

$$\begin{aligned} & \sum_{\tilde{a}_h^{(m)} \in \mathcal{A}^{(m)}} \phi_{\lambda,h}^{(m)}(\tilde{a}_h^{(m)} | s_{1:h}, a_{1:h-1}, a_h^{(m)}) \\ & = \frac{1}{p_\lambda(s_{1:h}, a_{1:h-1})} \left( \lambda p_{\phi^{(m)} \circ \pi}(s_{1:h}, a_{1:h-1}) \sum_{\tilde{a}_h^{(m)} \in \mathcal{A}^{(m)}} \phi_h^{(m)}(\tilde{a}_h^{(m)} | s_{1:h}, a_{1:h-1}, a_h^{(m)}) \right. \\ & \quad \left. + (1 - \lambda) p_{\tilde{\phi}^{(m)} \circ \pi}(s_{1:h}, a_{1:h-1}) \sum_{\tilde{a}_h^{(m)} \in \mathcal{A}^{(m)}} \tilde{\phi}_h^{(m)}(\tilde{a}_h^{(m)} | s_{1:h}, a_{1:h-1}, a_h^{(m)}) \right) \\ & = \frac{1}{p_\lambda(s_{1:h}, a_{1:h-1})} (\lambda p_{\phi^{(m)} \circ \pi}(s_{1:h}, a_{1:h-1}) + (1 - \lambda) p_{\tilde{\phi}^{(m)} \circ \pi}(s_{1:h}, a_{1:h-1})) = 1. \end{aligned}$$

Therefore,  $\phi_\lambda$  is a proper stochastic modification.

Next, we prove that the policy that induces  $p_\lambda$  takes the form  $\pi_\lambda = \phi_\lambda^{(m)} \circ \pi$ . We consider two cases.

**Case 1:**  $p_\lambda(s_{1:h}, a_{1:h-1}) > 0$ . In this case, we obtain that

$$\begin{aligned} & \pi_{\lambda,h}(a_h | s_{1:h}, a_{1:h-1}) \\ & \stackrel{(i)}{=} \frac{1}{p_\lambda(s_{1:h}, a_{1:h-1})} (\lambda p_{\phi^{(m)} \circ \pi}(s_{1:h}, a_{1:h-1}) + (1 - \lambda) p_{\tilde{\phi}^{(m)} \circ \pi}(s_{1:h}, a_{1:h-1})) \\ & \stackrel{(ii)}{=} \frac{1}{p_\lambda(s_{1:h}, a_{1:h-1})} (\lambda p_{\phi^{(m)} \circ \pi}(s_{1:h}, a_{1:h-1}) (\phi_h^{(m)} \circ \pi_h)(a_h | s_{1:h}, a_{1:h-1}) \\ & \quad + (1 - \lambda) p_{\tilde{\phi}^{(m)} \circ \pi}(s_{1:h}, a_{1:h-1}) (\tilde{\phi}_h^{(m)} \circ \pi_h)(a_h | s_{1:h}, a_{1:h-1})) \\ & \stackrel{(iii)}{=} \frac{1}{p_\lambda(s_{1:h}, a_{1:h-1})} \sum_{\tilde{a}_h^{(m)}} (\lambda p_{\phi^{(m)} \circ \pi}(s_{1:h}, a_{1:h-1}) \pi_h^{(m)}([\tilde{a}_h^{(m)}, a_h^{(\setminus m)}] | s_{1:h}, a_{1:h-1}) \\ & \quad + (1 - \lambda) p_{\tilde{\phi}^{(m)} \circ \pi}(s_{1:h}, a_{1:h-1}) \pi_h^{(m)}([\tilde{a}_h^{(m)}, a_h^{(\setminus m)}] | s_{1:h}, a_{1:h-1})) \\ & \stackrel{(iv)}{=} \sum_{\tilde{a}_h^{(m)}} \pi_h^{(m)}([\tilde{a}_h^{(m)}, a_h^{(\setminus m)}] | s_{1:h}, a_{1:h-1}) \phi_{\lambda,h}^{(m)}(a_h^{(m)} | s_{1:h}, a_{1:h-1}, \tilde{a}_h^{(m)}) \end{aligned}$$

where (i) uses eqs. (20) and (25), (ii) uses eq. (19), (iii) uses eq. (24), and (iv) uses eq. (28). This proves the claim due to eq. (24).

**Case 2:**  $p_\lambda(s_{1:h}, a_{1:h-1}) = 0$ . In this case, both  $\phi_{\lambda,h}^{(m)}$  and  $\pi_\lambda$  can be arbitrarily defined. Hence, we can simply define  $\pi_\lambda$  by eq. (24).  $\square$

## C Proof of Theorem 1

### C.1 Proof of item 1 for unconstrained Markov game

Throughout the proof, for any policy  $\pi$ , we denote  $\tilde{\phi}^{(m)}$  as the *optimal* stochastic modification associated with  $\pi$ , i.e.,  $V_0^{(m)}(\tilde{\phi}^{(m)} \circ \pi)$  achieves the maximum value over all stochastic modifications. In order for  $\pi$  to be a CE, it must satisfy  $V_0^{(m)}(\pi) \geq V_0^{(m)}(\tilde{\phi}^{(m)} \circ \pi)$ .

If for any optimal stochastic modification  $\tilde{\phi}^{(m)}$  associated with  $\pi$ , we can construct a corresponding deterministic modification  $\phi^{(m)}$  such that  $V_0^{(m)}(\phi^{(m)} \circ \pi) = V_0^{(m)}(\tilde{\phi}^{(m)} \circ \pi)$ , then the condition of item 1 guarantees that  $\pi$  is a CE and then item 1 is proved.

Next, for any policy  $\pi$  and any associated optimal stochastic modification  $\tilde{\phi}^{(m)}$ , we construct a deterministic modification  $\phi^{(m)}$  as follows: for any  $s_{1:h}, a_{1:h-1}, a_h^{(m)}$ , select an arbitrary  $\tilde{a}_h^{(m)}$  such that  $\tilde{\phi}^{(m)}(\tilde{a}_h^{(m)} | s_{1:h}, a_{1:h-1}, a_h^{(m)}) > 0$  (this always exists) and then simply define  $\phi^{(m)}(\tilde{a}_h^{(m)} | s_{1:h}, a_{1:h-1}, a_h^{(m)}) = 1$ , and 0 otherwise. It suffices to prove that  $V_0^{(m)}(\phi^{(m)} \circ \pi) = V_0^{(m)}(\tilde{\phi}^{(m)} \circ \pi)$  for any  $\pi$  satisfying the condition of item 1.

To proceed, we claim that one can find  $\lambda < 0$  such that the joint measure  $p_\lambda := \lambda p_{\phi^{(m)} \circ \pi} + (1 - \lambda)p_{\tilde{\phi}^{(m)} \circ \pi}$  satisfies eqs. (26) and (27). We will prove the validity of this claim later. Suppose this claim holds. Then based on Lemma B.1, the inducing policy of  $p_\lambda$  takes the form  $\pi_\lambda = \phi_\lambda^{(m)} \circ \pi$ , where  $\phi_\lambda^{(m)}$  is defined by eq. (28). Then, we obtain that

$$\begin{aligned} V_0^{(m)}(\tilde{\phi}^{(m)} \circ \pi) &\stackrel{(i)}{\geq} V_0^{(m)}(\phi_\lambda^{(m)} \circ \pi) \stackrel{(ii)}{=} \tilde{V}_0^{(m)}(p_\lambda) \\ &= \tilde{V}_0^{(m)}(\lambda p_{\phi^{(m)} \circ \pi} + (1 - \lambda)p_{\tilde{\phi}^{(m)} \circ \pi}) \\ &\stackrel{(iii)}{=} \lambda \tilde{V}_0^{(m)}(p_{\phi^{(m)} \circ \pi}) + (1 - \lambda)\tilde{V}_0^{(m)}(p_{\tilde{\phi}^{(m)} \circ \pi}) \\ &\stackrel{(iv)}{=} \lambda V_0^{(m)}(\phi^{(m)} \circ \pi) + (1 - \lambda)V_0^{(m)}(\tilde{\phi}^{(m)} \circ \pi), \end{aligned}$$

where (i) uses the optimality of  $\tilde{\phi}^{(m)}$ , (ii)-(iv) use the linear form of  $\tilde{V}_0^{(m)}(p_\pi)$  defined in eq. (22). The above inequality along with  $\lambda < 0$  implies that  $V_0^{(m)}(\phi^{(m)} \circ \pi) \geq V_0^{(m)}(\tilde{\phi}^{(m)} \circ \pi)$ . On the other hand,  $V_0^{(m)}(\tilde{\phi}^{(m)} \circ \pi) \geq V_0^{(m)}(\phi^{(m)} \circ \pi)$  based on the optimality of the stochastic modification  $\tilde{\phi}^{(m)}$ . Hence,  $V_0^{(m)}(\phi^{(m)} \circ \pi) = V_0^{(m)}(\tilde{\phi}^{(m)} \circ \pi)$  as desired. All left is to find  $\lambda < 0$  such that the joint measure  $p_\lambda$  satisfies eqs. (26) and (27). We prove them as follows.

**Proof of eq. (26):** Recall that  $p_\lambda = \lambda p_{\phi^{(m)} \circ \pi} + (1 - \lambda)p_{\tilde{\phi}^{(m)} \circ \pi}$  and  $\lambda < 0$ . If  $p_{\phi^{(m)} \circ \pi}(s_{1:h}, a_{1:h-1}) = 0$ , it is clear that eq. (26) holds. So we just need to consider the other case where  $p_{\phi^{(m)} \circ \pi}(s_{1:h}, a_{1:h-1}) > 0$ . In this case and by eq. (18), we must have that  $\rho(s_1), (\phi_1^{(m)} \circ \pi_1)(a_1 | s_1), \mathcal{P}(s_h | s_{h-1}, a_{h-1}), (\phi_h^{(m)} \circ \pi_h)(a_h | s_{1:h}, a_{1:h-1}) > 0$  for any  $h = 2, \dots, H$ . Then, eq. (24) implies that for any  $h = 2, \dots, H$ ,

$$\begin{aligned} 0 &< (\phi_h^{(m)} \circ \pi_h)(a_h | s_{1:h}, a_{1:h-1}) \\ &= \sum_{\tilde{a}_h^{(m)}} \phi_h^{(m)}(a_h^{(m)} | s_{1:h}, a_{1:h-1}, \tilde{a}_h^{(m)}) \pi_h([\tilde{a}_h^{(m)}, a_h^{(m)}] | s_{1:h}, a_{1:h-1}). \end{aligned}$$

Hence, there must exist  $\hat{a}_h^{(m)}$  such that  $\phi_h^{(m)}(a_h^{(m)} | s_{1:h}, a_{1:h-1}, \hat{a}_h^{(m)}) \pi_h([\hat{a}_h^{(m)}, a_h^{(m)}] | s_{1:h}, a_{1:h-1}) > 0$ . As  $\phi_h^{(m)}$  is the deterministic modification constructed at the beginning of this proof, we must have

$\phi_h^{(m)}(a_h^{(m)}|s_{1:h}, a_{1:h-1}, \widehat{a}_h^{(m)}) = 1$  and therefore the corresponding stochastic modification satisfies  $\widetilde{\phi}_h^{(m)}(a_h^{(m)}|s_{1:h}, a_{1:h-1}, \widehat{a}_h^{(m)}) > 0$ . Then, eq. (24) implies that

$$\begin{aligned} & (\widetilde{\phi}_h^{(m)} \circ \pi_h)(a_h|s_{1:h}, a_{1:h-1}) \\ &= \sum_{\widetilde{a}_h^{(m)}} \widetilde{\phi}_h^{(m)}(a_h^{(m)}|s_{1:h}, a_{1:h-1}, \widetilde{a}_h^{(m)}) \pi_h([\widetilde{a}_h^{(m)}, a_h^{(\setminus m)}]|s_{1:h}, a_{1:h-1}) \\ &\geq \widetilde{\phi}_h^{(m)}(a_h^{(m)}|s_{1:h}, a_{1:h-1}, \widehat{a}_h^{(m)}) \pi_h([\widehat{a}_h^{(m)}, a_h^{(\setminus m)}]|s_{1:h}, a_{1:h-1}) > 0. \end{aligned}$$

Similarly, we can prove that  $(\widetilde{\phi}_1^{(m)} \circ \pi_1)(a_1|s_1) > 0$  from  $(\phi_1^{(m)} \circ \pi_1)(a_1|s_1) > 0$ . Therefore, based on eq. (18), it is proved that whenever  $p_{\phi^{(m)} \circ \pi}(s_{1:h}, a_{1:h-1}) > 0$ , we have

$$\begin{aligned} & p_{\widetilde{\phi}^{(m)} \circ \pi}(s_{1:h}, a_{1:h}) \\ &= \rho(s_1) (\widetilde{\phi}_1^{(m)} \circ \pi_1)(a_1|s_1) \prod_{h'=2}^h \mathcal{P}(s_{h'}|s_{h'-1}, a_{h'-1}) (\widetilde{\phi}_{h'}^{(m)} \circ \pi_{h'})(a_{h'}|s_{1:h'}, a_{1:h'-1}) > 0. \end{aligned} \quad (29)$$

Therefore, eq. (26) holds for

$$0 > \lambda \geq - \frac{p_{\widetilde{\phi}^{(m)} \circ \pi}(s_{1:h}, a_{1:h})}{p_{\phi^{(m)} \circ \pi}(s_{1:h}, a_{1:h}) - p_{\widetilde{\phi}^{(m)} \circ \pi}(s_{1:h}, a_{1:h})} := w(s_{1:h}, a_{1:h}),$$

for any  $s_{1:h}, a_{1:h}$  whenever  $p_{\phi^{(m)} \circ \pi}(s_{1:h}, a_{1:h}) > p_{\widetilde{\phi}^{(m)} \circ \pi}(s_{1:h}, a_{1:h})$ , which implies that  $p_{\phi^{(m)} \circ \pi}(s_{1:h}, a_{1:h}) > 0$  and therefore  $p_{\widetilde{\phi}^{(m)} \circ \pi}(s_{1:h}, a_{1:h}) > 0$  based on eq. (29). Thus, we conclude that  $w(s_{1:h}, a_{1:h}) < 0$ . Consider the finite (and possibly empty) set  $A_1 := \{w(s_{1:h}, a_{1:h}) : 1 \leq h \leq H, p_{\phi^{(m)} \circ \pi}(s_{1:h}, a_{1:h}) > p_{\widetilde{\phi}^{(m)} \circ \pi}(s_{1:h}, a_{1:h})\}$ . If it is non-empty, eq. (26) holds for all  $0 > \lambda \geq \max A_1$  for constant  $\max A_1 < 0$ ; Otherwise, eq. (26) holds for all  $\lambda < 0$ .

**Proof of eq. (27):** If  $p_{\phi^{(m)} \circ \pi}(s_{1:h}, a_{1:h-1}) \phi_h^{(m)}(\widetilde{a}_h^{(m)}|s_{1:h}, a_{1:h-1}, a_h^{(m)}) = 0$  and  $\lambda < 0$ , then eq. (27) holds. Consider the other case  $p_{\phi^{(m)} \circ \pi}(s_{1:h}, a_{1:h-1}) \phi_h^{(m)}(\widetilde{a}_h^{(m)}|s_{1:h}, a_{1:h-1}, a_h^{(m)}) > 0$  and  $\lambda < 0$ . In this case, we have  $p_{\widetilde{\phi}^{(m)} \circ \pi}(s_{1:h}, a_{1:h-1}) > 0$  as proved in the proof of eq. (26), and we also have  $\phi_h^{(m)}(\widetilde{a}_h^{(m)}|s_{1:h}, a_{1:h-1}, a_h^{(m)}) = 1 > 0$  and thus  $\widetilde{\phi}_h^{(m)}(\widetilde{a}_h^{(m)}|s_{1:h}, a_{1:h-1}, a_h^{(m)}) > 0$  based on the construction of  $\phi_h^{(m)}$ . Following the same proof logic as that of eq. (26), we can find a constant  $A_2 < 0$  such that eq. (27) holds for all  $0 > \lambda \geq A_2$ .

In summary, we have proved that there exists  $\lambda < 0$  that guarantees both eqs. (26) and (27).

## C.2 Proof of item 2 for constrained Markov game

Here we construct a counter example to prove item 2. Consider a constrained Markov game with only one state  $\mathcal{S} = \{s\}$ , two agents with action spaces  $\mathcal{A}_1 = \mathcal{A}_2 = \{0, 1\}$  and horizon  $H = 1$ . For simplicity, we drop the time step index  $h = 1$  and state  $s$  in all notations throughout this example. Specifically, we denote  $\pi(a^{(1)}, a^{(2)})$ ,  $\pi^{(m)}(a^{(m)})$ ,  $\phi^{(m)}(\widetilde{a}^{(m)}|a^{(m)})$ ,  $m = 1, 2$ , as the joint policy, marginal policy and stochastic modification, respectively.

For both agents  $m = 1, 2$ , we define rewards  $r_0^{(m)} = a^{(m)}$ ,  $r_1^{(m)} = a^{(0)} + a^{(1)}$ ,  $r_2^{(m)} = 2 - a^{(0)} - a^{(1)}$  and constraint thresholds  $c_1^{(m)} = c_2^{(m)} = 0.6$ . Therefore,  $V_0^{(m)}(\pi) = \mathbb{E}_\pi r_0^{(m)} = \pi^{(m)}(1)$ ,  $V_1^{(m)}(\pi) = \mathbb{E}_\pi r_1^{(m)} = \pi^{(1)}(1) + \pi^{(2)}(1)$  and  $V_2^{(m)}(\pi) = \mathbb{E}_\pi r_2^{(m)} = 2 - \pi^{(1)}(1) - \pi^{(2)}(1) = \pi^{(1)}(0) + \pi^{(2)}(0)$ . Therefore, for both agents  $m = 1, 2$ , their value function constraints  $V_1^{(m)}(\pi) \geq 0.6$ ,  $V_2^{(m)}(\pi) \geq 0.6$  are equivalent to the following condition

$$0.6 \leq \pi^{(1)}(1) + \pi^{(2)}(1) \leq 1.4. \quad (30)$$

Now consider a uniform policy  $\bar{\pi}$  where  $\bar{\pi}(a^{(1)}, a^{(2)}) = 0.25$  for all  $a^{(1)}, a^{(2)} \in \{0, 1\}$ . This is a product policy which generates independent uniformly distributed actions  $a^{(1)}, a^{(2)}$  with  $\bar{\pi}^{(1)}(1) = \bar{\pi}^{(2)}(1) = 0.5$  that satisfy the constraints in eq. (30). Note that  $\mathcal{A}^{(1)}$  only includes two actions. Hence, the set of all possible deterministic modifications  $\phi^{(1)}$  includes the following three cases.

- (i)  $\phi^{(1)} \circ \bar{\pi} = \bar{\pi}$ : either  $\phi^{(1)}$  modifies any  $a^{(1)}$  to  $a^{(1)}$  or modifies any  $a^{(1)}$  to  $1 - a^{(1)}$ ;
- (ii)  $\phi^{(1)} \circ \bar{\pi} = \pi'$  that always generates  $a^{(1)} = 0$  and generates  $a^{(2)}$  uniformly at random:  $\phi^{(1)}$  modifies any  $a^{(1)}$  to 0;
- (iii)  $\phi^{(1)} \circ \bar{\pi} = \pi''$  that always generates  $a^{(1)} = 1$  and generates  $a^{(2)}$  uniformly at random:  $\phi^{(1)}$  modifies any  $a^{(1)}$  to 1.

However,  $\pi'$  and  $\pi''$  do not satisfy the constraint (30) since  $\pi'^{(1)}(1) + \pi'^{(2)}(1) = 0.5$  and  $\pi''^{(1)}(1) + \pi''^{(2)}(1) = 1.5$ . Hence, the only feasible deterministic modifications  $\phi^{(1)}$  are the two ones in (i) with  $\phi^{(1)} \circ \bar{\pi} = \bar{\pi}$ , which implies that  $V_0^{(1)}(\phi^{(1)} \circ \bar{\pi}) = V_0^{(1)}(\bar{\pi}) = \bar{\pi}^{(1)}(1) = 0.5$ . Therefore, such a  $\bar{\pi}$  satisfies the assumption of item 2.

Now consider a stochastic modification  $\phi^{(1)}$  defined by  $\phi^{(1)}(1|a_1) = 0.9$  and  $\phi^{(1)}(0|a_1) = 0.1$  for  $a_1 \in \{0, 1\}$ . Then  $\phi^{(1)} \circ \bar{\pi}$  independently generates Bernoulli distributed actions  $a^{(1)} \sim \text{Bern}(0.9)$  and  $a^{(2)} \sim \text{Bern}(0.5)$ . Hence,  $(\phi^{(1)} \circ \bar{\pi})^{(1)}(1) + (\phi^{(1)} \circ \bar{\pi})^{(2)}(1) = 1.4$ , which means  $\phi^{(1)}$  is feasible based on eq. (30). In addition,  $V_0^{(1)}(\phi^{(1)} \circ \bar{\pi}) = (\phi^{(1)} \circ \bar{\pi})^{(1)}(1) = 0.9$ , which is strictly larger than  $V_0^{(1)}(\bar{\pi}) = 0.5$ . Therefore,  $\bar{\pi}$  is not a CE as defined in Definition 3.2.

## D Proof of Theorem 2

For any policy  $\pi$  and its associated joint measure  $p_\pi$ , recall the following equivalent Lagrangian functions defined in eq. (23).

$$L^{(m)}(\pi, \lambda^{(m)}) = \tilde{L}^{(m)}(p_\pi, \lambda^{(m)}).$$

Then, the desired strong duality result shown in eq. (7) is equivalent to the following equation.

$$\max_{p \in \mathcal{X}} \min_{\lambda^{(m)} \in \mathbb{R}_+^{d_m}} \tilde{L}^{(m)}(p, \lambda^{(m)}) = \min_{\lambda^{(m)} \in \mathbb{R}_+^{d_m}} \max_{p \in \mathcal{X}} \tilde{L}^{(m)}(p, \lambda^{(m)}),$$

where the set  $\mathcal{X} := \{p_{\phi^{(m)} \circ \pi} : \phi^{(m)} \text{ is a stochastic modification}\}$  is defined for the fixed  $\pi$ . The nice property of the Lagrangian function  $\tilde{L}^{(m)}(p, \lambda^{(m)})$  is that it is a linear function in  $p$ , which has an advantage toward establishing strong duality.

Based on the minimax theorem (Lemma 9.2 of [2]), it suffices to prove the following properties:

- (I).  $\tilde{L}^{(m)}(p, \cdot)$  is convex and lower semi-continuous, and  $\tilde{L}^{(m)}(\cdot, p)$  is concave. These properties directly follow from the definition of  $\tilde{L}$  in eq. (23).
- (II).  $\mathbb{R}_+^{d_m}$  is a convex set, which holds obviously.
- (III).  $\mathcal{X}$  is a convex set, which follows from Lemma B.1 since eqs. (26) and (27) always hold for  $\lambda \in [0, 1]$ .
- (IV).  $\mathcal{X}$  is a compact set.

Hence, it remains to prove (IV).

As the state space  $\mathcal{S}$ , action space  $\mathcal{A}$  and the horizon  $H$  are finite, we can represent  $p_\pi$  as a vector with entries  $p_\pi(s_{1:H}, a_{1:H})$  for every  $s_{1:H}, a_{1:H} \in \mathcal{S}^H \times \mathcal{A}^H$ . Hence, the set  $\mathcal{X} \subset [0, 1]^{(|\mathcal{S}| |\mathcal{A}|)^H}$  is bounded. Then, it suffices to prove that  $\mathcal{X}$  is a closed set, i.e.,  $p \in \mathcal{X}$  if  $p_{\phi_{[k]}^{(m)} \circ \pi}(s_{1:H}, a_{1:H}) \xrightarrow{k} p(s_{1:H}, a_{1:H}), \forall s_{1:H}, a_{1:H}$  for some  $p_{\phi_{[k]}^{(m)} \circ \pi} \in \mathcal{X}$  (Note that the notation  $\phi_{[k]}^{(m)}$  indexed by  $k$  differs from  $\phi_h^{(m)}$  where  $h$  denotes time step).

Similar to  $\mathcal{X}$ , any stochastic modification  $\phi^{(m)}$  can also be seen as a bounded finite-dimensional vector with entries  $\phi^{(m)}(\tilde{a}_h^{(m)} | s_{1:h}, a_{1:h-1}, a_h^{(m)}) \in [0, 1]$ . Hence,  $\{\phi_{[k]}^{(m)} : k \in \mathbb{N}^+\}$  has a convergent subsequence  $\{\phi_{[k_i]}^{(m)} : i \in \mathbb{N}^+\}$  such that  $\phi_{[k_i]}^{(m)}(\tilde{a}_h^{(m)} | s_{1:h}, a_{1:h-1}, a_h^{(m)}) \xrightarrow{i} \phi^*(\tilde{a}_h^{(m)} | s_{1:h}, a_{1:h-1}, a_h^{(m)})$  for any  $s_{1:h}, a_{1:h-1}, a_h^{(m)}, \tilde{a}_h^{(m)}$ , which implies that  $\phi^*(\tilde{a}_h^{(m)} | s_{1:h}, a_{1:h-1}, a_h^{(m)}) \geq 0$  and  $\sum_{\tilde{a}_h^{(m)}} \phi^*(\tilde{a}_h^{(m)} | s_{1:h}, a_{1:h-1}, a_h^{(m)}) = 1$ . Therefore,  $\phi^*$  is a proper stochastic modification.

Then based on eq. (24), it holds for any  $s_{1:h}, a_{1:h}$  that

$$\begin{aligned}
& (\phi_{[k_i],h}^{(m)} \circ \pi_h)(a_h | s_{1:h}, a_{1:h-1}) \\
&= \sum_{\tilde{a}_h^{(m)}} \phi_{[k_i],h}^{(m)}(a_h^{(m)} | s_{1:h}, a_{1:h-1}, \tilde{a}_h^{(m)}) \pi_h([\tilde{a}_h^{(m)}, a_h^{(\setminus m)}] | s_{1:h}, a_{1:h-1}) \\
&\stackrel{i}{\rightarrow} \sum_{\tilde{a}_h^{(m)}} \phi_h^*(a_h^{(m)} | s_{1:h}, a_{1:h-1}, \tilde{a}_h^{(m)}) \pi_h([\tilde{a}_h^{(m)}, a_h^{(\setminus m)}] | s_{1:h}, a_{1:h-1}) \\
&= (\phi_h^* \circ \pi_h)(a_h | s_{1:h}, a_{1:h-1}). \tag{31}
\end{aligned}$$

On one hand, the above inequality and eq. (18) imply that for any  $s_{1:h}, a_{1:h}, p_{\phi_{[k_i]}\circ\pi}(s_{1:h}, a_{1:h}) \stackrel{i}{\rightarrow} p_{\phi^* \circ \pi}(s_{1:h}, a_{1:h})$ . On the other hand,  $p_{\phi_{[k_i]}\circ\pi}(s_{1:h}, a_{1:h}) \stackrel{i}{\rightarrow} p(s_{1:h}, a_{1:h})$ . Therefore,  $p = p_{\phi^* \circ \pi}$  for  $\phi^*$  being a stochastic modification, and thus  $p \in \mathcal{X}$ .

## E The Range of the Optimal Dual Variable

Before proving Theorem 3 and Corollary 5.1 on the non-asymptotic convergence of Algorithm 1, we first consider the optimal dual variable  $\lambda_*^{(m)}$  of the minimax optimization problem in eq. (7) and derive its range below, which is important for the selection of the projection set  $\Lambda^{(m)}$  in Algorithm 1.

**Lemma E.1.** *The optimal dual variable  $\lambda_*^{(m)}$  satisfies the following range.*

$$\lambda_{*,j}^{(m)} \leq \frac{Hr_{0,\max}^{(m)}}{\xi_j^{(m)}}, j = 1, \dots, d_m. \tag{32}$$

*Proof.* Given  $\pi$ , denote  $\phi_*^{(m)}$  as the optimal solution to the constrained optimization problem in eq. (4) and denote  $\tilde{\phi}^{(m)}$  as the stochastic modification that satisfies Assumption 1, i.e.,  $V^{(m)}(\tilde{\phi}^{(m)} \circ \pi) - c^{(m)} \geq \xi^{(m)}$ . Then we have

$$\begin{aligned}
Hr_{0,\max}^{(m)} &\stackrel{(i)}{\geq} V_0^{(m)}(\phi_*^{(m)} \circ \pi) \\
&\stackrel{(ii)}{=} \max_{\phi^{(m)}} L^{(m)}(\phi^{(m)} \circ \pi, \lambda_*^{(m)}) \\
&\geq L^{(m)}(\tilde{\phi}^{(m)} \circ \pi, \lambda_*^{(m)}) \\
&= V_0^{(m)}(\tilde{\phi}^{(m)} \circ \pi) + \sum_{j=1}^{d_m} \lambda_{*,j}^{(m)} (V_j^{(m)}(\tilde{\phi}^{(m)} \circ \pi) - c_j^{(m)}) \\
&\stackrel{(iii)}{\geq} \sum_{j=1}^{d_m} \lambda_{*,j}^{(m)} \xi_j^{(m)},
\end{aligned}$$

where (i) and (iii) use  $V_0^{(m)}(\pi) \in [0, Hr_{0,\max}^{(m)}], \forall j = 0, 1, \dots, d_m$  which is directly implied by Assumption 2, (ii) uses Theorem 2 which implies the equivalence between the constrained optimization problem in eq. (4) and the minimax optimization problem in eq. (7), and (iii) also uses  $\lambda_{*,j}^{(m)} \geq 0$  and  $V_j^{(m)}(\pi) - c_j^{(m)} \geq \xi_j^{(m)}$ . Since  $\xi_j^{(m)} > 0$ , the above inequality implies eq. (32)  $\square$

## F Proof of Theorem 3

Assumption 2 and the value functions defined in eq. (4) imply that for any  $m = 1, \dots, M, j = 0, 1, \dots, d_m$  and joint policy  $\pi$ , we have

$$0 \leq V_j^{(m)}(\pi) = \mathbb{E}_\pi \left[ \sum_{h=1}^H r_{j,h}^{(m)}(s_h, a_h) \middle| s_1 \sim \rho \right] \leq Hr_{j,\max}^{(m)}. \tag{33}$$

Hence, for any  $m = 1, \dots, M$  and joint policy  $\pi$

$$\|V^{(m)}(\pi)\| = \sqrt{\sum_{j=1}^{d_m} V_j^{(m)}(\pi)^2} \leq H \sqrt{\sum_{j=1}^{d_m} (r_{j,\max}^{(m)})^2} = HR_{\max}^{(m)} \quad (34)$$

Furthermore, Assumption 1 implies that there is a joint policy  $\pi'$  such that  $0 \leq c^{(m)} \leq V^{(m)}(\pi')$ , so

$$\|c^{(m)}\| \leq \|V^{(m)}(\pi')\| \leq HR_{\max}^{(m)}. \quad (35)$$

Then,

$$\begin{aligned} 0 &\leq \|\lambda_T^{(m)}\|^2 \\ &\stackrel{(i)}{=} \sum_{t=0}^{T-1} (\|\lambda_{t+1}^{(m)}\|^2 - \|\lambda_t^{(m)}\|^2) \\ &\stackrel{(ii)}{\leq} \sum_{t=0}^{T-1} (\|\lambda_t^{(m)} - \eta(V^{(m)}(\pi_t) - c^{(m)})\|^2 - \|\lambda_t^{(m)}\|^2) \\ &\stackrel{(iii)}{\leq} 2\eta \sum_{t=0}^{T-1} \lambda_t^{(m)\top} (c^{(m)} - V^{(m)}(\pi_t)) + \eta^2 \sum_{t=0}^{T-1} (\|V^{(m)}(\pi_t)\| + \|c^{(m)}\|)^2 \\ &\stackrel{(iv)}{\leq} 2\eta \sum_{t=0}^{T-1} \lambda_t^{(m)\top} (V^{(m)}(\phi_{t*}^{(m)} \circ \pi_t) - V^{(m)}(\pi_t)) + 4T(\eta HR_{\max}^{(m)})^2, \end{aligned}$$

where (i) uses the initialization  $\lambda_0^{(m)} = 0$ , (ii) uses eq. (12) and  $0 \in \Lambda^{(m)}$ , (iii) uses triangular inequality, and (iv) uses eqs. (34) and (35) and the constraint that  $V^{(m)}(\phi_{t*}^{(m)} \circ \pi) \geq c^{(m)}$  satisfied by the optimal modification  $\phi_{t*}^{(m)}$  of the constrained optimization problem in eq. (4) for  $\pi = \pi_t$ . Rearranging the above inequality yields that

$$\sum_{t=0}^{T-1} \lambda_t^{(m)\top} (V^{(m)}(\pi_t) - V^{(m)}(\phi_{t*}^{(m)} \circ \pi_t)) \leq 2\eta T (HR_{\max}^{(m)})^2. \quad (36)$$

Note that

$$\begin{aligned} 0 &\leq \sum_{t=0}^{T-1} \left( \max_{\phi^{(m)}} L^{(m)}(\phi^{(m)} \circ \pi_t, \lambda_t^{(m)}) - L^{(m)}(\phi_{t*}^{(m)} \circ \pi_t, \lambda_t^{(m)}) \right) \\ &\stackrel{(i)}{=} \sum_{t=0}^{T-1} \left( \max_{\phi^{(m)}} V_{\lambda_t}^{(m)}(\phi^{(m)} \circ \pi_t) - V_{\lambda_t}^{(m)}(\phi_{t*}^{(m)} \circ \pi_t) \right) \\ &\stackrel{(ii)}{\leq} \sum_{t=0}^{T-1} \left( \epsilon + V_{\lambda_t}^{(m)}(\pi_t) - V_{\lambda_t}^{(m)}(\phi_{t*}^{(m)} \circ \pi_t) \right) \\ &\stackrel{(iii)}{=} \sum_{t=0}^{T-1} \left( \epsilon + V_0^{(m)}(\pi_t) - V_0^{(m)}(\phi_{t*}^{(m)} \circ \pi_t) + \lambda_t^{(m)\top} (V^{(m)}(\pi_t) - V^{(m)}(\phi_{t*}^{(m)} \circ \pi_t)) \right) \quad (37) \\ &\stackrel{(iv)}{\leq} \sum_{t=0}^{T-1} \left( \epsilon - D^{(m)}(\pi_t) \right) + 2\eta T (HR_{\max}^{(m)})^2, \end{aligned}$$

where (i) uses the rewritten Lagrangian function  $L^{(m)}(\phi^{(m)} \circ \pi, \lambda^{(m)}) = V_{\lambda}^{(m)}(\phi^{(m)} \circ \pi) - \lambda^{(m)\top} c^{(m)}$ , (ii) uses eq. (11), (iii) uses  $V_{\lambda}^{(m)}(\pi) = V_0^{(m)}(\pi) + \lambda^{(m)\top} V^{(m)}(\pi)$ ,  $\forall \pi$  implies by eqs. (2) and (9), and (iv) uses eqs. (5) and (36). Rearranging the above inequality yields that

$$\mathbb{E}_T[D^{(m)}(\pi_t)] = \frac{1}{T} \sum_{t=0}^{T-1} D^{(m)}(\pi_t) \leq 2\eta (HR_{\max}^{(m)})^2 + \epsilon,$$



which proves the duality gap in eq. (14) by substituting  $\eta = \frac{1}{\sqrt{T}}$ .

Next, we prove the constraint violation in eq. (15).

For any  $\lambda^{(m)} \in \Lambda^{(m)}$ , it holds that

$$\begin{aligned}
& \|\lambda_{t+1}^{(m)} - \lambda^{(m)}\|^2 \\
& \stackrel{(i)}{\leq} \|\lambda_t^{(m)} - \eta(V^{(m)}(\pi_t) - c^{(m)}) - \lambda^{(m)}\|^2 \\
& \stackrel{(ii)}{\leq} \|\lambda_t^{(m)} - \lambda^{(m)}\|^2 - 2\eta(\lambda_t^{(m)} - \lambda^{(m)})^\top (V^{(m)}(\pi_t) - c^{(m)}) + \eta^2(\|V^{(m)}(\pi_t)\| + \|c^{(m)}\|)^2 \\
& \stackrel{(iii)}{\leq} \|\lambda_t^{(m)} - \lambda^{(m)}\|^2 - 2\eta(\lambda_t^{(m)} - \lambda^{(m)})^\top (V^{(m)}(\pi_t) - c^{(m)}) + 4(\eta HR_{\max}^{(m)})^2
\end{aligned}$$

where (i) uses eq. (12) and  $\lambda^{(m)} \in \Lambda^{(m)}$ , (ii) uses triangular inequality, (iii) uses eqs. (34) and (35).

Telescoping the above inequality over  $t = 0, 1, \dots, T-1$  and using  $\lambda_0^{(m)} = 0$  yields that

$$\eta \sum_{t=0}^{T-1} (\lambda_t^{(m)} - \lambda^{(m)})^\top (V^{(m)}(\pi_t) - c^{(m)}) \leq \frac{1}{2} \|\lambda^{(m)}\|^2 + 2T(\eta HR_{\max}^{(m)})^2. \quad (38)$$

Since  $V^{(m)}(\phi_{t^*}^{(m)} \circ \pi_t) \geq c^{(m)}$  and  $\lambda_t^{(m)} \in \mathbb{R}_+^{d_m}$ , eq. (37) implies that

$$\eta \sum_{t=0}^{T-1} \lambda_t^{(m)\top} (c^{(m)} - V^{(m)}(\pi_t)) \leq \eta \sum_{t=0}^{T-1} (\epsilon + V_0^{(m)}(\pi_t) - V_0^{(m)}(\phi_{t^*}^{(m)} \circ \pi)) \quad (39)$$

Summing up eqs. (38) and (39) yields that

$$\begin{aligned}
\eta \sum_{t=0}^{T-1} \lambda^{(m)\top} (c^{(m)} - V^{(m)}(\pi_t)) & \leq \eta \sum_{t=0}^{T-1} (\epsilon + V_0^{(m)}(\pi_t) - V_0^{(m)}(\phi_{t^*}^{(m)} \circ \pi)) \\
& \quad + \frac{1}{2} \|\lambda^{(m)}\|^2 + 2T(\eta HR_{\max}^{(m)})^2. \quad (40)
\end{aligned}$$

Denote  $\Phi_t^{(m)} := \{\phi^{(m)} : V^{(m)}(\phi^{(m)} \circ \pi_t) \geq \min(c^{(m)}, V^{(m)}(\pi_t))\}$ , which is a non-empty set that includes identity modification  $\phi^{(m)}$  such that  $I^{(m)} \circ \pi_t = \pi_t$ . Hence,

$$\begin{aligned}
V_0^{(m)}(\phi_{t^*}^{(m)} \circ \pi_t) & = \max_{\phi^{(m)}} \min_{\lambda^{(m)} \in \mathbb{R}_+^{d_m}} L^{(m)}(\phi^{(m)} \circ \pi_t, \lambda^{(m)}) \\
& \stackrel{(i)}{=} \min_{\lambda^{(m)} \in \mathbb{R}_+^{d_m}} \max_{\phi^{(m)}} L^{(m)}(\phi^{(m)} \circ \pi_t, \lambda^{(m)}) \\
& \stackrel{(ii)}{\geq} \max_{\phi^{(m)} \in \Phi_t^{(m)}} L^{(m)}(\phi^{(m)} \circ \pi_t, \lambda_{t^*}^{(m)}) \\
& = \max_{\phi^{(m)} \in \Phi_t^{(m)}} (V_0^{(m)}(\phi^{(m)} \circ \pi_t) + (\lambda_{t^*}^{(m)})^\top [V^{(m)}(\phi^{(m)} \circ \pi_t) - c^{(m)}]) \\
& \stackrel{(iii)}{\geq} \max_{\phi^{(m)} \in \Phi_t^{(m)}} V_0^{(m)}(\phi^{(m)} \circ \pi_t) + (\lambda_{t^*}^{(m)})^\top \min(0, V^{(m)}(\pi_t) - c^{(m)}) \\
& \stackrel{(iv)}{\geq} V_0^{(m)}(\pi_t) - (\lambda_{t^*}^{(m)})^\top (c^{(m)} - V^{(m)}(\pi_t))_+
\end{aligned}$$

where (i) uses Theorem 2, (ii) uses the fact that  $\Phi_t^{(m)}$  is only a subset of stochastic modifications and denotes that  $\lambda_{t^*}^{(m)} = \arg \min_{\lambda^{(m)} \in \mathbb{R}_+^{d_m}} \max_{\phi^{(m)}} L^{(m)}(\phi^{(m)} \circ \pi_t, \lambda^{(m)})$ , (iii) uses  $\lambda_{t^*}^{(m)} \in \mathbb{R}_+^{d_m}$  and the definition of  $\Phi_t^{(m)}$ , and (iv) uses the fact that the identity modification  $\phi^{(m)} \in \Phi_t^{(m)}$ . Substituting the above inequality into eq. (40) and rearranging it, we obtain that

$$\eta \sum_{t=0}^{T-1} \left( \lambda^{(m)\top} (c^{(m)} - V^{(m)}(\pi_t)) - (\lambda_{t^*}^{(m)})^\top (c^{(m)} - V^{(m)}(\pi_t))_+ \right)$$

$$\leq \frac{1}{2} \|\lambda^{(m)}\|^2 + 2T(\eta H R_{\max}^{(m)})^2 + \eta T \epsilon. \quad (41)$$

Using eq. (32) and selecting  $\lambda_j^{(m)} = \frac{2Hr_{0,\max}^{(m)}}{\xi_j^{(m)}} \mathbb{1}\{V_j^{(m)}(\pi_t) \leq c_j^{(m)}\}$  (this satisfies  $\lambda^{(m)} \in \Lambda^{(m)}$ ), we obtain that

$$\begin{aligned} & \lambda^{(m)\top} (c^{(m)} - V^{(m)}(\pi_t)) - (\lambda_{t*}^{(m)})^\top (c^{(m)} - V^{(m)}(\pi_t))_+ \\ & \geq \sum_{j=1}^{d_m} \frac{Hr_{0,\max}^{(m)}}{\xi_j^{(m)}} (c_j^{(m)} - V_j^{(m)}(\pi_t))_+, \end{aligned}$$

where the last inequality uses eq. (32). Substituting the above inequality into eq. (41) yields that

$$\begin{aligned} & \eta H r_{0,\max}^{(m)} \sum_{t=0}^{T-1} \sum_{j=1}^{d_m} (\xi_j^{(m)})^{-1} (c_j^{(m)} - V_j^{(m)}(\pi_t))_+ \\ & \leq \frac{1}{2} \|\lambda^{(m)}\|^2 + 2T(\eta H R_{\max}^{(m)})^2 + \eta T \epsilon \\ & \stackrel{(i)}{\leq} 2(Hr_{0,\max}^{(m)})^2 \sum_{j=1}^{d_m} (\xi_j^{(m)})^{-2} + 2T(\eta H R_{\max}^{(m)})^2 + \eta T \epsilon, \end{aligned}$$

where (i) uses  $\|\lambda^{(m)}\| \leq 2Hr_{0,\max}^{(m)} \sqrt{\sum_{j=1}^{d_m} (\xi_j^{(m)})^{-2}}$  for our choice  $\lambda_j^{(m)} = \frac{2Hr_{0,\max}^{(m)}}{\xi_j^{(m)}} \mathbb{1}\{V_j^{(m)}(\pi_t) \leq c_j^{(m)}\}$ . Dividing both sides of the above inequality by  $\eta T H r_{0,\max}^{(m)}$  and substituting  $\eta = \frac{1}{\sqrt{T}}$ , we prove the constraint violation in eq. (15).

## G Proof of Corollary 5.1

The surrogate rewards defined in eq. (8) has the following bound

$$\begin{aligned} 0 & \leq R_{\lambda_t, h}^{(m)}(s_h, a_h) = r_{0,h}^{(m)}(s_h, a_h) + \lambda_t^{(m)\top} r_h^{(m)}(s_h, a_h) \\ & \leq r_{0,h}^{(m)}(s_h, a_h) + \|\lambda_t^{(m)}\| \|r_h^{(m)}(s_h, a_h)\| \\ & \stackrel{(i)}{\leq} r_{0,\max}^{(m)} + 2Hr_{0,\max}^{(m)} R_{\max}^{(m)} \sqrt{\sum_{j=1}^{d_m} (\xi_j^{(m)})^{-2}} := \tilde{R}_{\max}^{(m)} \end{aligned} \quad (42)$$

where (i) uses Assumption 2 and  $\lambda_{t,j}^{(m)} \in [0, \frac{2Hr_{0,\max}^{(m)}}{\xi_j^{(m)}}]$  (since  $\lambda_t^{(m)} \in \Lambda^{(m)}$  based on eq. (12)). Note that the V-learning in [31] assumes the rewards to range in  $[0, 1]$ . To adjust to this assumption, we apply V-learning to the scaled rewards  $\frac{1}{\tilde{R}_{\max}^{(m)}} R_{\lambda_t, h}^{(m)}(s_h, a_h) \in [0, 1]$  with corresponding value function  $\frac{1}{\tilde{R}_{\max}^{(m)}} V_{\lambda_t}^{(m)}$ . Then based on Theorem 7 of [31], it takes  $\tilde{\mathcal{O}}(H^5 S A^2 (\epsilon / \tilde{R}_{\max}^{(m)})^{-2}) = \tilde{\mathcal{O}}(H^5 S A^2 \epsilon^{-2})$  samples to reach the  $\epsilon / \tilde{R}_{\max}^{(m)}$ -CE of this scaled Markov game with probability at least  $1 - \delta / T$  for any  $\delta \in (0, 1)$  (we replace  $\delta$  with  $\delta / T$  which only changes the hidden logarithm factor in  $\tilde{\mathcal{O}}$ ), that is,

$$\max_{\phi^{(m)}} \frac{1}{\tilde{R}_{\max}^{(m)}} V_{\lambda}^{(m)}(\phi^{(m)} \circ \pi_t) - \frac{1}{\tilde{R}_{\max}^{(m)}} V_{\lambda}^{(m)}(\pi_t) \leq \frac{\epsilon}{\tilde{R}_{\max}^{(m)}},$$

which is equivalent to eq. (11). Applying union bound over the  $T$  iterations yields that eq. (11) holds for all iterations  $t = 0, 1, \dots, T-1$  with probability at least  $1 - \delta$ . In that case, the convergence rates in eqs. (14) and (15) hold. Substituting  $T = \max_m 4\epsilon^{-2} (H R_{\max}^{(m)})^2 (\sum_{j=1}^{d_m} (\xi_j^{(m)})^{-2} + H R_{\max}^{(m)})^2$  and  $r_{0,\max}^{(m)} \geq \frac{1}{H}$  into these convergence rates yields that

$$\mathbb{E}_{\tilde{t}}(D^{(m)}(\pi_{\tilde{t}})) \leq \frac{2(H R_{\max}^{(m)})^2}{\sqrt{T}} + \epsilon \leq 2\epsilon,$$

$$\begin{aligned}
\mathbb{E}_{\tilde{t}}(W^{(m)}(\pi_{\tilde{t}})) &\leq \frac{2HR_{\max}^{(m)}}{\sqrt{T}} \sum_{j=1}^{d_m} (\xi_j^{(m)})^{-2} + \frac{2H(R_{\max}^{(m)})^2}{r_{0,\max}^{(m)}\sqrt{T}} + \frac{\epsilon}{Hr_{0,\max}^{(m)}} \\
&\leq \frac{1}{\sqrt{T}} \left( 2HR_{\max}^{(m)} \sum_{j=1}^{d_m} (\xi_j^{(m)})^{-2} + 2(HR_{\max}^{(m)})^2 \right) + \epsilon \leq 2\epsilon.
\end{aligned}$$

The above two inequalities prove that  $\max(\mathbb{E}_{\tilde{t}}D^{(m)}(\pi_{\tilde{t}}), \mathbb{E}_{\tilde{t}}W^{(m)}(\pi_{\tilde{t}})) \leq 2\epsilon$ .

Since each of the  $T = \mathcal{O}(H^4\epsilon^{-2})$  iterations takes  $\tilde{\mathcal{O}}(H^5SA^2\epsilon^{-2})$  samples, the required sample complexity is  $T\tilde{\mathcal{O}}(H^5SA^2\epsilon^{-2}) = \tilde{\mathcal{O}}(H^9SA^2\epsilon^{-4})$ .
